# Supplementary material
Source: HighWire-hosted journal article supplement (https://jnm.snmjournals.org/highwire/filestream/99051/field_highwire_adjunct_files/0/230714_Supplemental_Data.pdf)
Supplement: 230714_Supplemental_Data.pdf [file 230714_Supplemental_Data.pdf]

# Supplemental Figure 1

| HIGH PARA-AORTICS                   |  |  |  |  |  | Study: Positron Lymphography High Grade Endometrial Cancer                                                                                                                                                                                                                                                         |    |    |    |    |                                     | HIGH PARA-AORTICS                   |  |  |  |    |    |    |    |    |
|-------------------------------------|--|--|--|--|--|--------------------------------------------------------------------------------------------------------------------------------------------------------------------------------------------------------------------------------------------------------------------------------------------------------------------|----|----|----|----|-------------------------------------|-------------------------------------|--|--|--|----|----|----|----|----|
| Dye+ Yes/No                         |  |  |  |  |  | Surgery Form<br>Patient Name _____ Date _____<br>MRN _____ Study ID _____<br>SLN Modality _____<br><div style="display: flex; justify-content: space-around; align-items: center;"> <span>Right</span> 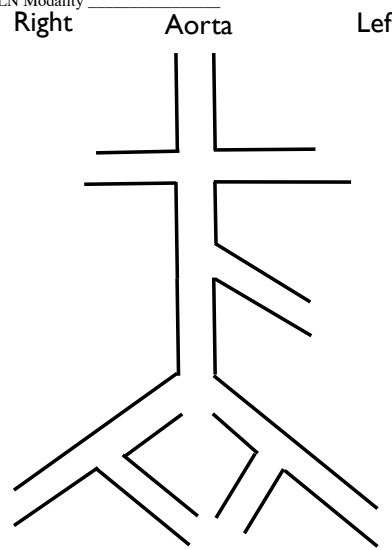 <span>Left</span> </div> |    |    |    |    |                                     | Dye+ Yes/No                         |  |  |  |    |    |    |    |    |
| Predict Malignant/Benign            |  |  |  |  |  |                                                                                                                                                                                                                                                                                                                    |    |    |    |    |                                     | Predict Malignant/Benign            |  |  |  |    |    |    |    |    |
| Sentinel Yes/No                     |  |  |  |  |  |                                                                                                                                                                                                                                                                                                                    |    |    |    |    |                                     | Sentinel Yes/No                     |  |  |  |    |    |    |    |    |
| Path Label (ex: "Left inguinal LN") |  |  |  |  |  |                                                                                                                                                                                                                                                                                                                    |    |    |    |    |                                     | Path Label (ex: "Left inguinal LN") |  |  |  |    |    |    |    |    |
| positron lymphography (list ID)     |  |  |  |  |  |                                                                                                                                                                                                                                                                                                                    |    |    |    |    |                                     | positron lymphography (list ID)     |  |  |  |    |    |    |    |    |
| LOW PARA-AORTICS                    |  |  |  |  |  | LOW PARA-AORTICS                                                                                                                                                                                                                                                                                                   |    |    |    |    |                                     |                                     |  |  |  |    |    |    |    |    |
| Dye+ Yes/No                         |  |  |  |  |  | Dye+ Yes/No                                                                                                                                                                                                                                                                                                        |    |    |    |    |                                     |                                     |  |  |  |    |    |    |    |    |
| Predict Malignant/Benign            |  |  |  |  |  | Predict Malignant/Benign                                                                                                                                                                                                                                                                                           |    |    |    |    |                                     |                                     |  |  |  |    |    |    |    |    |
| Sentinel Yes/No                     |  |  |  |  |  | Sentinel Yes/No                                                                                                                                                                                                                                                                                                    |    |    |    |    |                                     |                                     |  |  |  |    |    |    |    |    |
| Path Label (ex: "Left inguinal LN") |  |  |  |  |  | Path Label (ex: "Left inguinal LN")                                                                                                                                                                                                                                                                                |    |    |    |    |                                     |                                     |  |  |  |    |    |    |    |    |
| positron lymphography (list ID)     |  |  |  |  |  | positron lymphography (list ID)                                                                                                                                                                                                                                                                                    |    |    |    |    |                                     |                                     |  |  |  |    |    |    |    |    |
| Common Iliac                        |  |  |  |  |  | Common Iliac                                                                                                                                                                                                                                                                                                       |    |    |    |    |                                     |                                     |  |  |  |    |    |    |    |    |
| Dye+ Yes/No                         |  |  |  |  |  | Dye+ Yes/No                                                                                                                                                                                                                                                                                                        |    |    |    |    |                                     |                                     |  |  |  |    |    |    |    |    |
| Predict Malignant/Benign            |  |  |  |  |  | Predict Malignant/Benign                                                                                                                                                                                                                                                                                           |    |    |    |    |                                     |                                     |  |  |  |    |    |    |    |    |
| Sentinel Yes/No                     |  |  |  |  |  | Sentinel Yes/No                                                                                                                                                                                                                                                                                                    |    |    |    |    |                                     |                                     |  |  |  |    |    |    |    |    |
| Path Label (ex: "Left inguinal LN") |  |  |  |  |  | Path Label (ex: "Left inguinal LN")                                                                                                                                                                                                                                                                                |    |    |    |    |                                     |                                     |  |  |  |    |    |    |    |    |
| positron lymphography (list ID)     |  |  |  |  |  | positron lymphography (list ID)                                                                                                                                                                                                                                                                                    |    |    |    |    |                                     |                                     |  |  |  |    |    |    |    |    |
| External Iliac                      |  |  |  |  |  | External Iliac                                                                                                                                                                                                                                                                                                     |    |    |    |    |                                     |                                     |  |  |  |    |    |    |    |    |
| Dye+ Yes/No                         |  |  |  |  |  | Dye+ Yes/No                                                                                                                                                                                                                                                                                                        |    |    |    |    |                                     |                                     |  |  |  |    |    |    |    |    |
| Predict Malignant/Benign            |  |  |  |  |  | Predict Malignant/Benign                                                                                                                                                                                                                                                                                           |    |    |    |    |                                     |                                     |  |  |  |    |    |    |    |    |
| Sentinel Yes/No                     |  |  |  |  |  | Sentinel Yes/No                                                                                                                                                                                                                                                                                                    |    |    |    |    |                                     |                                     |  |  |  |    |    |    |    |    |
| Path Label (ex: "Left inguinal LN") |  |  |  |  |  | Path Label (ex: "Left inguinal LN")                                                                                                                                                                                                                                                                                |    |    |    |    |                                     |                                     |  |  |  |    |    |    |    |    |
| positron lymphography (list ID)     |  |  |  |  |  | positron lymphography (list ID)                                                                                                                                                                                                                                                                                    |    |    |    |    |                                     |                                     |  |  |  |    |    |    |    |    |
| Obturator                           |  |  |  |  |  | Obturator                                                                                                                                                                                                                                                                                                          |    |    |    |    |                                     |                                     |  |  |  |    |    |    |    |    |
| Dye+ Yes/No                         |  |  |  |  |  | A1                                                                                                                                                                                                                                                                                                                 | A2 | A3 | A4 | A5 | Dye+ Yes/No                         |                                     |  |  |  | A1 | A2 | A3 | A4 | A5 |
| Predict Malignant/Benign            |  |  |  |  |  |                                                                                                                                                                                                                                                                                                                    |    |    |    |    | Predict Malignant/Benign            |                                     |  |  |  |    |    |    |    |    |
| Sentinel Yes/No                     |  |  |  |  |  |                                                                                                                                                                                                                                                                                                                    |    |    |    |    | Sentinel Yes/No                     |                                     |  |  |  |    |    |    |    |    |
| Path Label (ex: "Left inguinal LN") |  |  |  |  |  |                                                                                                                                                                                                                                                                                                                    |    |    |    |    | Path Label (ex: "Left inguinal LN") |                                     |  |  |  |    |    |    |    |    |
| positron lymphography (list ID)     |  |  |  |  |  |                                                                                                                                                                                                                                                                                                                    |    |    |    |    | positron lymphography (list ID)     |                                     |  |  |  |    |    |    |    |    |

**Supplemental Figure 1:** Anatomic reference chart used by surgeon and study radiologist to facilitate positron lymphography (PLG) sentinel lymph node (SLN) location and concordance with dye-identified SLN.

Supplemental Table 1.

Comparing investigational SLN mapping (A) and blue and green dye SLN mapping (B) with final pathology at the nodal level (n=113).

**A. Investigational SLN mapping**

|                                                            |    |                                                            |    |
|------------------------------------------------------------|----|------------------------------------------------------------|----|
| Investigational SLN mapping negative<br>Pathology negative | 71 | Investigational SLN mapping negative<br>Pathology positive | NA |
| Investigational SLN mapping positive<br>Pathology negative | 15 | Investigational SLN mapping positive<br>Pathology positive | 27 |
| Total number of nodes                                      | 86 |                                                            | 27 |

**B. Dye SLN mapping**

|                                                |    |                                                | Total |     |
|------------------------------------------------|----|------------------------------------------------|-------|-----|
| Dye SLN mapping negative<br>Pathology negative | 86 | Dye SLN mapping negative<br>Pathology positive | 27    | 113 |
| Dye SLN mapping positive<br>Pathology negative | NA | Dye SLN mapping positive<br>Pathology positive | NA    | NA  |

NA = full LN dissection was not performed and number of nodes is unknown

Supplemental Table 2.

Comparing investigational SLN mapping (A) and blue and green dye SLN mapping (B) with final pathology at the patient level (n=20).

**A. Investigational SLN mapping**

|                                                            |    |                                                            |   |
|------------------------------------------------------------|----|------------------------------------------------------------|---|
| Investigational SLN mapping negative<br>Pathology negative | 15 | Investigational SLN mapping negative<br>Pathology positive | 0 |
| Investigational SLN mapping positive<br>Pathology negative | 2  | Investigational SLN mapping positive<br>Pathology positive | 3 |
| Total number of patients                                   | 17 |                                                            | 3 |

**B. Dye SLN mapping**

|                                                |    |                                                |    | Totals |
|------------------------------------------------|----|------------------------------------------------|----|--------|
| Dye SLN mapping negative<br>Pathology negative | 17 | Dye SLN mapping negative<br>Pathology positive | 3  | 20     |
| Dye SLN mapping positive<br>Pathology negative | NA | Dye SLN mapping positive<br>Pathology positive | NA | NA     |

NA = full LN dissection was not performed and number of nodes is unknown

Supplemental Table 3.

Comparing investigational SLN mapping with blue and green dye SLN mapping at the (A) nodal and (N) patient level.

**A. Node level (n=113)**

|                                                                  |    |                                                                  |    |
|------------------------------------------------------------------|----|------------------------------------------------------------------|----|
| Dye SLN mapping negative<br>Investigational SLN mapping negative | 71 | Dye SLN mapping positive<br>Investigational SLN mapping negative | NA |
| Dye SLN mapping negative<br>Investigational SLN mapping positive | 42 | Dye SLN mapping positive<br>Investigational SLN mapping positive | NA |

**A. Patient level (n=20)**

|                                                                  |    |                                                                  |    |
|------------------------------------------------------------------|----|------------------------------------------------------------------|----|
| Dye SLN mapping negative<br>Investigational SLN mapping negative | 15 | Dye SLN mapping positive<br>Investigational SLN mapping negative | NA |
| Dye SLN mapping negative<br>Investigational SLN mapping positive | 5  | Dye SLN mapping positive<br>Investigational SLN mapping positive | NA |

NA = full LN dissection was not performed and number of nodes is unknown

# Appendix 1. Organ absorbed doses and effective dose (assumes 10mCi injection at the cervix)

| Organ                   | Diagnostic CAP-CT<br>(per impACT)<br>(MSKCC Female mean) | Systemic<br>(per ICRP-106, 2008) | Cervical LN<br>(per OLINDA) | 8 mCi Administration |                  |                      | 10 mCi Administration |                  |                       | 12 mCi Administration |                  |                       |
|-------------------------|----------------------------------------------------------|----------------------------------|-----------------------------|----------------------|------------------|----------------------|-----------------------|------------------|-----------------------|-----------------------|------------------|-----------------------|
|                         |                                                          |                                  |                             | Systemic Frac        | Cervical LN Frac | Total PET/CT         | Systemic Frac         | Cervical LN Frac | Total PET/CT          | Systemic Frac         | Cervical LN Frac | Total PET/CT          |
|                         |                                                          |                                  |                             | 50%                  | 50%              | Organ Dose           | 50%                   | 50%              | Organ Dose            | 50%                   | 50%              | Organ Dose            |
|                         |                                                          |                                  |                             | 4                    | 4                | Estimate             | 5                     | 5                | Estimate              | 6                     | 6                | Estimate              |
|                         | mGy/scan                                                 | mGy/MBq                          | mGy/MBq                     | mGy                  | mGy              | mGy                  | mGy                   | mGy              | mGy                   | mGy                   | mGy              | mGy                   |
| Adrenals                | 1.35E+01                                                 | 1.20E-02                         | 2.70E-03                    | 1.8E+00              | 4.0E-01          | 1.6E+01              | 2.2E+00               | 5.0E-01          | 1.6E+01               | 2.7E+00               | 6.0E-01          | 1.7E+01               |
| Bladder                 | 1.42E+01                                                 | 1.30E-01                         | 9.62E-02                    | 1.9E+01              | 1.4E+01          | 4.8E+01              | 2.4E+01               | 1.8E+01          | 5.6E+01               | 2.9E+01               | 2.1E+01          | 6.4E+01               |
| Bone surfaces           | 2.03E+01                                                 | 1.10E-02                         | 5.19E-03                    | 1.6E+00              | 7.7E-01          | 2.3E+01              | 2.0E+00               | 9.6E-01          | 2.3E+01               | 2.4E+00               | 1.2E+00          | 2.4E+01               |
| Brain                   | 1.61E+01                                                 | 3.80E-02                         | 1.48E-05                    | 5.6E+00              | 2.2E-03          | 2.2E+01              | 7.0E+00               | 2.7E-03          | 2.3E+01               | 8.4E+00               | 3.3E-03          | 2.5E+01               |
| Breasts                 | 1.20E+01                                                 | 8.80E-02                         | 5.91E-04                    | 1.3E+01              | 8.7E-02          | 2.5E+01              | 1.6E+01               | 1.1E-01          | 2.8E+01               | 2.0E+01               | 1.3E-01          | 3.2E+01               |
| Gallbladder             | 1.44E+01                                                 | 1.30E-02                         | 1.04E-02                    | 1.9E+00              | 1.5E+00          | 1.8E+01              | 2.4E+00               | 1.9E+00          | 1.9E+01               | 2.9E+00               | 2.3E+00          | 2.0E+01               |
| Gastrointestinal tract  |                                                          |                                  |                             |                      |                  |                      |                       |                  |                       |                       |                  |                       |
| - stomach               | 1.44E+01                                                 | 1.10E-02                         | 4.96E-03                    | 1.6E+00              | 7.3E-01          | 1.7E+01              | 2.0E+00               | 9.2E-01          | 1.7E+01               | 2.4E+00               | 1.1E+00          | 1.8E+01               |
| - small intestine       | 1.35E+01                                                 | 1.20E-02                         | 6.32E-02                    | 1.8E+00              | 9.4E+00          | 2.5E+01              | 2.2E+00               | 1.2E+01          | 2.7E+01               | 2.7E+00               | 1.4E+01          | 3.0E+01               |
| - colon                 |                                                          | 1.30E-02                         |                             | 1.9E+00              |                  | 1.9E+00              | 2.4E+00               |                  | 2.4E+00               | 2.9E+00               |                  | 2.9E+00               |
| - Upper large intestine | 1.35E+01                                                 | 1.20E-02                         | 3.26E-02                    | 1.8E+00              | 4.8E+00          | 2.0E+01              | 2.2E+00               | 6.0E+00          | 2.2E+01               | 2.7E+00               | 7.2E+00          | 2.3E+01               |
| - Lower large intestine | 1.27E+01                                                 | 1.40E-02                         | 3.54E-02                    | 2.1E+00              | 5.2E+00          | 2.0E+01              | 2.6E+00               | 6.5E+00          | 2.2E+01               | 3.1E+00               | 7.9E+00          | 2.4E+01               |
| Heart                   | 1.53E+01                                                 | 6.70E-02                         | 1.14E-03                    | 9.9E+00              | 1.7E-01          | 2.5E+01              | 1.2E+01               | 2.1E-01          | 2.8E+01               | 1.5E+01               | 2.5E-01          | 3.0E+01               |
| Kidneys                 | 1.47E+01                                                 | 1.70E-02                         | 5.66E-03                    | 2.5E+00              | 8.4E-01          | 1.8E+01              | 3.1E+00               | 1.0E+00          | 1.9E+01               | 3.8E+00               | 1.3E+00          | 2.0E+01               |
| Liver                   | 1.38E+01                                                 | 2.10E-02                         | 4.05E-03                    | 3.1E+00              | 6.0E-01          | 1.8E+01              | 3.9E+00               | 7.5E-01          | 1.8E+01               | 4.7E+00               | 9.0E-01          | 1.9E+01               |
| Lungs                   | 1.53E+01                                                 | 2.00E-02                         | 8.00E-04                    | 3.0E+00              | 1.2E-01          | 1.8E+01              | 3.7E+00               | 1.5E-01          | 1.9E+01               | 4.4E+00               | 1.8E-01          | 2.0E+01               |
| Muscles                 | 9.59E+00                                                 | 1.00E-02                         | 1.16E-02                    | 1.5E+00              | 1.7E+00          | 1.3E+01              | 1.9E+00               | 2.1E+00          | 1.4E+01               | 2.2E+00               | 2.6E+00          | 1.4E+01               |
| Oesophagus              |                                                          | 1.20E-02                         |                             | 1.8E+00              |                  | 1.8E+00              | 2.2E+00               |                  | 2.2E+00               | 2.7E+00               |                  | 2.7E+00               |
| Ovaries                 | 1.26E+01                                                 | 1.40E-02                         | 1.27E-01                    | 2.1E+00              | 1.9E+01          | 3.3E+01              | 2.6E+00               | 2.3E+01          | 3.9E+01               | 3.1E+00               | 2.8E+01          | 4.4E+01               |
| Pancreas                | 1.32E+01                                                 | 1.30E-02                         | 4.30E-03                    | 1.9E+00              | 6.4E-01          | 1.6E+01              | 2.4E+00               | 8.0E-01          | 1.6E+01               | 2.9E+00               | 9.5E-01          | 1.7E+01               |
| Red marrow              | 1.12E+01                                                 | 1.10E-02                         | 1.22E-02                    | 1.6E+00              | 1.8E+00          | 1.5E+01              | 2.0E+00               | 2.3E+00          | 1.5E+01               | 2.4E+00               | 2.7E+00          | 1.6E+01               |
| Skin                    | 8.56E+00                                                 | 7.80E-03                         | 3.28E-03                    | 1.2E+00              | 4.9E-01          | 1.0E+01              | 1.4E+00               | 6.1E-01          | 1.1E+01               | 1.7E+00               | 7.3E-01          | 1.1E+01               |
| Spleen                  | 1.34E+01                                                 | 1.10E-02                         | 3.62E-03                    | 1.6E+00              | 5.4E-01          | 1.6E+01              | 2.0E+00               | 6.7E-01          | 1.6E+01               | 2.4E+00               | 8.0E-01          | 1.7E+01               |
| Thymus                  | 1.69E+01                                                 | 1.20E-02                         | 4.77E-04                    | 1.8E+00              | 7.1E-02          | 1.9E+01              | 2.2E+00               | 8.8E-02          | 1.9E+01               | 2.7E+00               | 1.1E-01          | 2.0E+01               |
| Thyroid                 | 2.16E+01                                                 | 1.00E-02                         | 1.25E-04                    | 1.5E+00              | 1.9E-02          | 2.3E+01              | 1.9E+00               | 2.3E-02          | 2.3E+01               | 2.2E+00               | 2.8E-02          | 2.4E+01               |
| Uterus                  | 1.38E+01                                                 | 1.80E-02                         | 5.64E+00                    | 2.7E+00              | 8.3E+02          | 8.5E+02              | 3.3E+00               | 1.0E+03          | 1.1E+03               | 4.0E+00               | 1.3E+03          | 1.3E+03               |
| Remaining organs        |                                                          | 1.20E-02                         |                             | 1.8E+00              |                  | 1.8E+00              | 2.2E+00               |                  | 2.2E+00               | 2.7E+00               |                  | 2.7E+00               |
| Effective Dose          | 1.34E+01<br>mSv/scan                                     | 1.90E-02<br>mSv/MBq              | 1.78E-01<br>mSv/MBq         | 2.8E+00<br>mSv       | 2.6E+01<br>mSv   | 4.3E+01<br>mSv/8 mCi | 3.5E+00<br>mSv        | 3.3E+01<br>mSv   | 5.0E+01<br>mSv/10 mCi | 4.2E+00<br>mSv        | 4.0E+01<br>mSv   | 5.7E+01<br>mSv/12 mCi |

## Appendix 2. Gynecologic Oncology Sentinel Lymph Node Mapping Algorithm

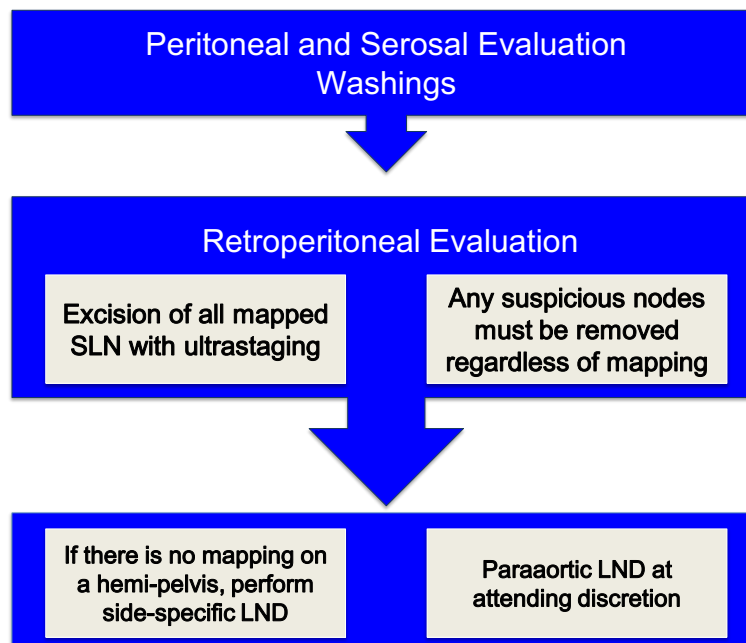

*SLN, sentinel lymph node; LND, lymph node dissection*

*Barlin JN, Khoury-Collado F, Kim CH, et al. The importance of applying a sentinel lymph node mapping algorithm in endometrial cancer staging: beyond removal of blue nodes. Gynecol Oncol 2012; 125: 531–5.*

### Appendix 3. Dominant patterns for sentinel lymph node mapping after intracervical injection.

A.

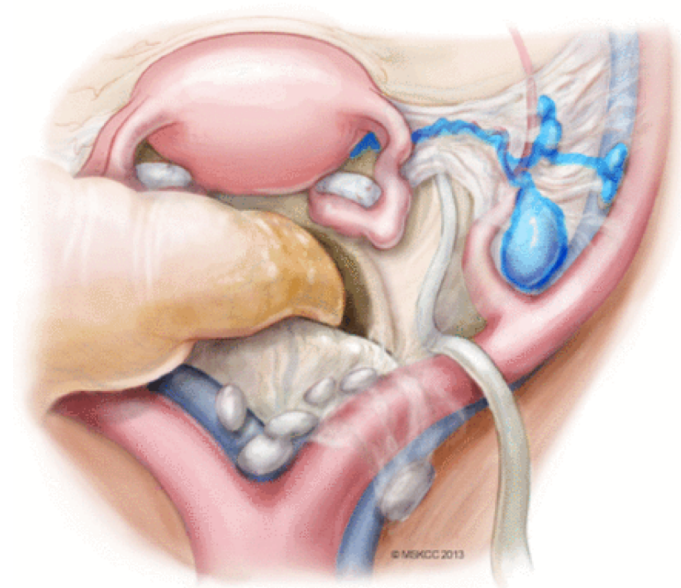

B.

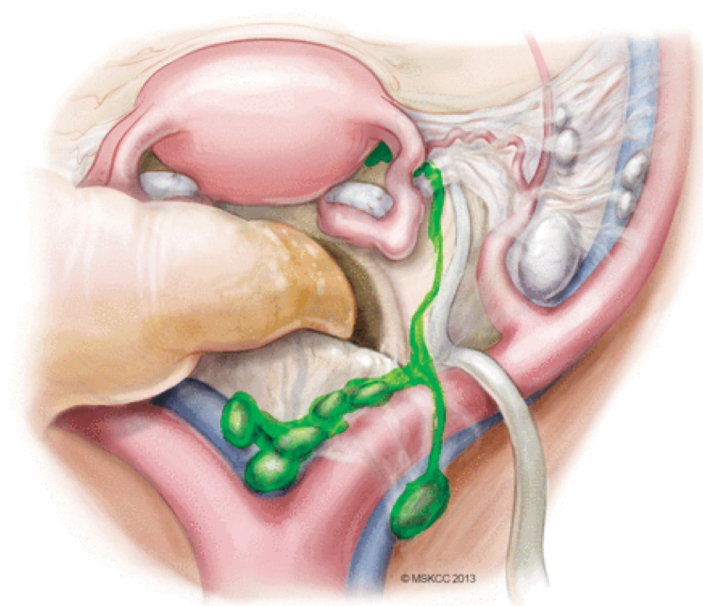

A. The most common sentinel lymph node location after a cervical injection are medial to the external iliac vessels, ventral to the hypogastric vessels, and in the superior portion of the obturator space. B. The less common sentinel lymph node locations of sentinel lymph nodes are seen when channels travel within the mesoreuter cephalad to the common iliac vessels and presacral region.

Courtesy of Abu-Rustum NR, Levine DA, Barakat RR, eds. Atlas of Procedures in Gynecologic Oncology, 3rd ed. London: Informa Healthcare; 2013. ©2013, Memorial Sloan-Kettering Cancer Center.

# Appendix 4. Ultrastaging technique for sentinel lymph nodes in endometrial and cervical cancer.

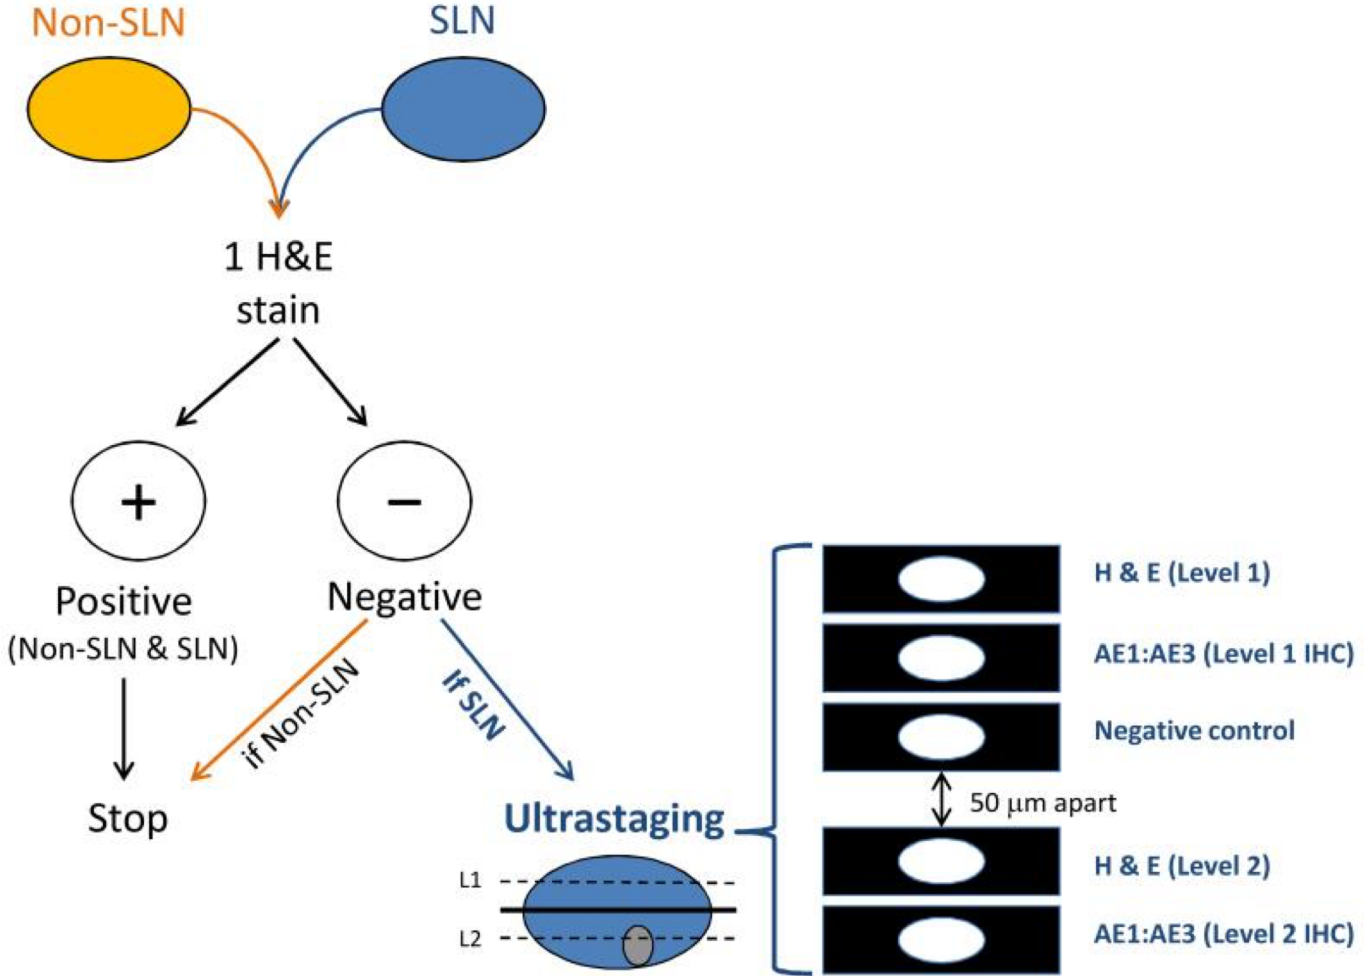

Kim CH, Soslow RA, Park KJ, Barber EL, Khoury-Collado F, Barlin JN, Sonoda Y, Hensley ML, Barakat RR, Abu-Rustum NR. Pathologic Ultrastaging Improves Micrometastasis Detection in Sentinel Lymph Nodes during Endometrial Cancer Staging. *Int J Gynecol Cancer*. 2013 Jun;23(5): 964-970.



# Appendix 5. Micromorphometry of positive nodes.

## Micromorphometric features of SLN deposits

| Histology                  | ID | SLN No.        | No. of deposits | Size (mm)      | % of LN | Subcapsular depth (mm) | Shape/ Distribution                                                                                   |
|----------------------------|----|----------------|-----------------|----------------|---------|------------------------|-------------------------------------------------------------------------------------------------------|
| Endometrial Carcinosarcoma | 1  | R obt<br>1/1 + | Multiple        | See<br>'Shape' | <1      | 0                      | Single cells and small clusters (<0.1mm) within subcapsular sinus, spanning a maximum length of 3.0mm |
| Endocervical AC            | 5  | R Obt<br>1/2 + | 1               | 4.2x3.0        | 15      | 3.0                    | Nodule, expansile                                                                                     |
| Endometrial serous         | 15 | L Obt<br>1/5 + | 1               | 10.0x6.0       | 60      | 6.0                    | Nodule, infiltrative                                                                                  |
|                            |    | R Obt<br>1/1+  | 1               | 8.0x8.0        | 40      | 8.0                    | Nodule, infiltrative                                                                                  |

# Appendix 5. Micromorphometry of positive nodes.

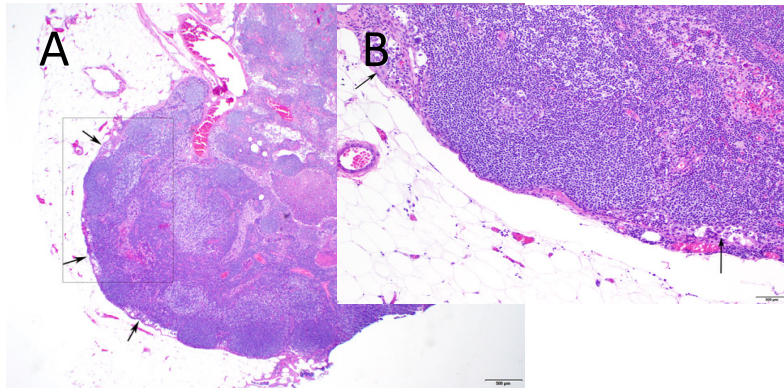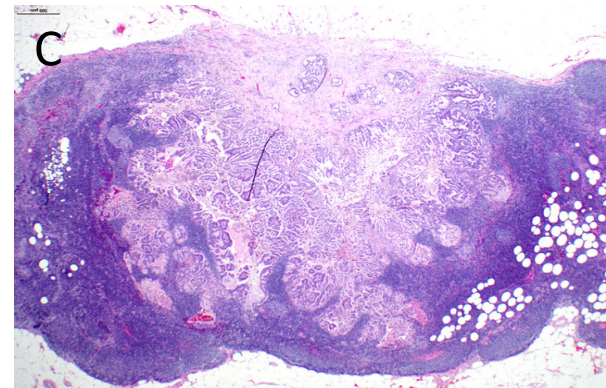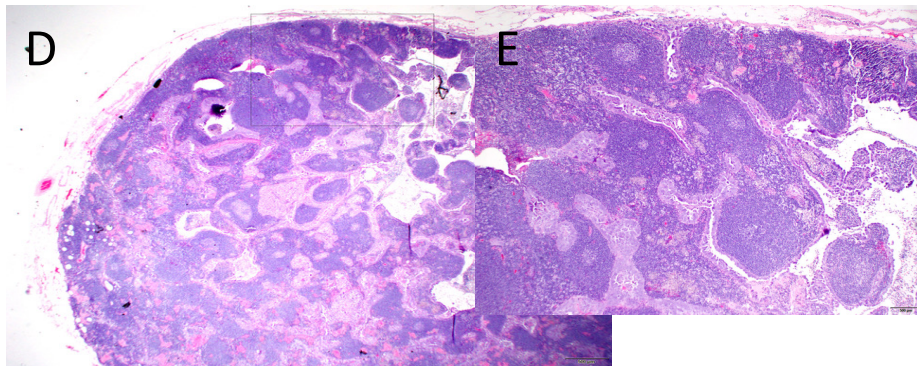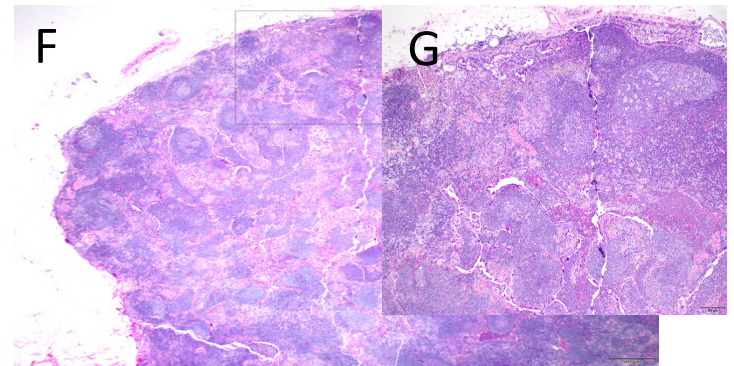

(A.) Patient ID 1. Deposits (arrows) of metastatic carcinomatous component of carcinosarcoma in subcapsular sinus of lymph node, low-power view of lymph node; (B) area denoted by rectangle in (A).

(C.) Patient ID 5. Single expansile nodular deposit of metastatic adenocarcinoma extending from capsule of lymph node into the nodal parenchyma.

(D.) Patient ID 15. Nodular deposit of metastatic serous carcinoma extending from capsule of lymph node into the parenchyma. The tumor nodule comprises cords and glands infiltrating between nodal parenchyma, low-power; (E.) area denoted by rectangle in (D).

(F.) Patient ID 15. Nodular deposit of metastatic serous carcinoma extending from capsule of lymph node into the parenchyma. The tumor nodule comprises cords and glands infiltrating between nodal parenchyma, low-power; (G.) area denoted by rectangle in (F).

See Appendix 4 for complete micromorphometric descriptions.
